# Supplementary material for: HIPK2 Is Required for Midbody Remnant Removal Through Autophagy-Mediated Degradation
Source: PubMed Central journal article supplement (PMC7525647; doi:10.3389/fcell.2020.572094), 2020-09-15
Supplement: Table_1.pdf [file Table_1.pdf]

Supplementary Table S1

|                  | CYTOKINESIS DEFECTS    |                       |
|------------------|------------------------|-----------------------|
|                  | Aberrant midbodies (%) | Binucleated cells (%) |
| siCtr            | 4.7 ± 2.1              | 2.1 ± 1.1             |
| <b>siHIPK2</b>   | <b>64 ± 6</b>          | <b>17 ± 2.3</b>       |
| siCtr            | 6.7 ± 1.2              | 3.3 ± 1.6             |
| <b>siSpastin</b> | <b>75 ± 6.7</b>        | <b>5 ± 1.2</b>        |
| siCtr            | 9.1 ± 2.9              | 2.2 ± 1.1             |
| <b>si-ech2B</b>  | <b>34.8 ± 3.7</b>      | <b>2.7 ± 0.8</b>      |
